# Supplementary material
Source: publisher site journal article supplement (https://www.dovepress.com/article/311254)
Supplement: Supplementary file 1 [file get_supplementary_file.php]

**Appendix 1 Characteristics of the Delphi Survey Respondents by Round**

| **Characteristic** | **No. (%)of Respondents** | |
| --- | --- | --- |
| **Round 1 (n=16)** | **Round 2 (n=17)** |
| **Age (y)** | | |
| <40 | 3 | 3 |
| 41-60 | 4 | 5 |
| ≥61 | 9 | 9 |
| **Country** | | |
| China | 12 | 12 |
| America | 2 | 1 |
| Canada | 0 | 1 |
| Australia | 1 | 1 |
| New Zealand | 1 | 1 |
| Finland | 0 | 1 |
| **Institution** |  |  |
| Hospital | 9 | 9 |
| University | 6 | 7 |
| Academic Institution | 1 | 1 |
| **Specialty** | | |
| Clinical Medicine | 9 | 9 |
| Evidence-based Medicine | 4 | 3 |
| Epidemiology | 2 | 3 |
| Health Research | 1 | 1 |
| Clinical Pharmacology | 0 | 1 |
| **Guideline Development Experience** | | |
| Yes | 16 | 17 |

**Appendix 2 Questionnaire and results of first round Delphi survey**

| **Questions and opinions of participants** | **No. of participants** |
| --- | --- |
| **1** Planning and scoping guidelines |
| **1.1** Is there any difference between primary care guidelines and general guidelines in guideline planning step? |
| - The basic principle is the same. | 4 |
| - Developing guidelines for any level or population need to know the medical process. | 1 |
| - In America，there is difference between primary care guidelines and general guideline because of the resource and technical capability. | 1 |
| - The PICOs would be likely to be broader and much more difficult to define in primary care guideline. As a result of this and the existing evidence base, searches will be more complex and messier, and the evidence is less likely to be clear cut. Multi-morbidity and other issues seen in this context will be very important. | 1 |
| - Before planning the primary care guideline, we should implement the general guideline in primary care institutions to evaluate the applicability and to explore the methods for adoption or *de novo* development. | 1 |
| **1.2 Should we evaluate the applicability of current guidelines to primary care institutions?** |
| - Yes, there is difference between primary care and tertiary hospitals in terms of personnel, health care resources and aspects. | 8 |
| **1.3 If yes. how to evaluate the** **applicability？** |  |
| - When accessing the applicability, the internal variance within primary health care institutions should be considered. Therefore, the applicability both to the primary care institutions as a whole and to primary care institutions in different levels and regions should be evaluated. - Questions of applicability happen in layers (e.g. population; health system; health service; clinical condition, clinical questions; etc) And it’s rarely black or white. More often it’s about deciding how close is close enough. | 3  1 |
| - To understand the organizational structure, medical resources, medical service procedure and payment of primary care institutions. | 4 |
| - Access the accessibility, affordability, feasibility in primary care institutions of interventions recommended by existing guidelines. | 2 |
| - The evaluation of evidence in current guidelines might be useful | 1 |
| **1.4 How to evaluate health resources in primary care institutions？** |
| - By sampling survey. | 3 |
| - To take advantage of existing data from National Health Service Survey or other information sources. | 2 |
| **2. Setting up guideline groups** |
| **2.1 Should primary care providers be included in guideline group？** |  |
| - In China, even the primary care providers are not high educated, it is still suggested that they should be included and their opinions should be of important proportion. Otherwise, the guideline may not be applicable or intelligible to primary medical institutions. | 1 |
| - Primary care providers should be included in the guideline steering group and the external review group. Whether they should be included in the guideline development group depends on the professional skills of primary care providers. | 3 |
| **2.2 Appropriate proportion of primary care providers in the guideline group** |
| - 5-10% | 1 |
| - 10-20% | 2 |
| - 20-30% | 5 |
| **3. Formulating questions** |
| **3.1 Is there any difference between regular guidelines and primary guidelines in formulating questions?** |  |
| - PICOS might be more complicated for primary care guideline, since patient in primary care are usually with multi-morbidities. Multi-morbidities should be considered when formulating questions. | 1 |
| - Questions formulated for primary care guideline should be valued by primary care providers, and matched with the mission and service capacity of primary care institutions. | 2 |
| **3.2Number of questions** |  |
| - <10 | 5 |
| - 10-20 | 1 |
| - Number of questions depends on the objective of the guideline ,resources and plan (eg. funding, human resources etc.) | 9 |
| - Number of questions depends on the orientation and functions of primary health care institutions | | 1 | | --- | |
| **4. C**hoosing outcomes |  |
| **4.1** Is there any difference between primary care guidelines and general guidelines in choosing outcomes? |  |
| - The priority of outcomes should be ranked by patients from primary care institutions, primary health care providers, and health care providers from tertiary hospitals. | 4 |
| - Rating the importance of outcomes should be multidisciplinary team. | 2 |
| - According to the current situations in China，the importance of outcomes should be ranked by experts rather than primary health care providers. | 2 |
| - Depends on the purpose and content of guideline. | 1 |
| **5.** Evidence retrieval |  |
| **5.1** Is there any difference between primary care guidelines and general guidelines in evidence retrieval? |
| - A comprehensive search is not necessary. | 1 |
| **6. Evidence assessment** |  |
| **6.1** Is there any difference between primary care guidelines and general guidelines in evidence assessment? |
| - The method and standard of evidence assessment should be the same. | 10 |
| **6.2** How to assess the applicability of evidence for primary health care institutions？ |  |
| - Through questionnaire survey or discussion seminar | 3 |
| **6.3 Should we consider the source of evidence (from which level of medical institutions), when assess the evidence ?** |  |
| - The source of evidence is not crucial, but the quality and the population it could be apply for. | 1 |
| - Who made evidence is not really important，and what is important is whether the process of evidence assessment is scientific and the quality of the evidence is high. | 3 |
| - Evidence could be classified according to sources, but no need to give priority to evidence from primary care institutions. | 1 |
| - Systematic review of evidence rather than give priority to evidence from primary care institutions |  |
| - Search for local evidence is important, but do not need to focus on evidence derived from primary care institutions. | 2 |
| **7. Developing recommendations** |  |
| **7.1** Is there any difference between primary care guidelines and general guidelines in the development of recommendations? |
| - Methods are the same. But the opinions of different stakeholder should be consulted when developing recommendations. | 10 |
| - Delphi method and qualitative survey could be used to evaluate the accessibility of intervention in primary care. | 1 |
| **7.2 Should the value and preference of patients and health practitioners be assessed when developing recommendations?** |  |
| - Yes. In addition, the orientation of primary care institutions should be considered. | 1 |
| **8. Producing and publishing guideline** |  |
| 8.1 Is there any difference between primary care guidelines and general guidelines in producing and publishing guidelines? |  |
| - The format of guideline should be in consistent with the reading habits of primary care providers. | 1 |
| - Recommendations should be the main content in summary version guidelines. | 8 |
| - Both full version and summary version are needed, with a link between them. | 1 |
| - The difference from general guidelines could be presented in primary care guideline. | 2 |
| **9.** Implementation and evaluation |  |
| 9.1 Is there any difference between primary care guidelines and general guidelines in implementation and evaluation ? |  |
| - Implementation of primary care guideline should be consistent with the access that are available for primary care providers. | 1 |
| **9.2 The main ways for primary care guideline implementation** |  |
| - In addition to guideline databases and biomedical literature databases, free access to guidelines should be made available for primary care providers, and the printed guideline should be issued. | 13 |
| - Provide supporting training. | 8 |
| **10. Updating guidelines** |  |
| **10.1 The updating cycle of *de novo* development of primary guideline** |  |
| - <1year | 1 |
| - 1-2years | 3 |
| - 3-5years | 3 |
| - Not sure | 3 |
| **10.2 The updating cycle depends on** |  |
| - It depends the topic and field because the knowledge updating speed is different in different areas. | |
| - If there are new evidences derived from systematic review or other source ,the guideline should be updated. | 3 |
| - The updating cycle of primary guideline is not only depends on the speed of evidence renewal, but also on change ofresources in primary care institutions. | 2 |
| **10.3 Update primary care guideline independently or in sync with general guideline?** |  |
| - Update in sync with general guideline for higher efficiency | 3 |
| - The updating cycle should be longer than that of general guideline | 1 |

Notes: General guideline refers to guideline developed for all levels of medical institutions. Primary care guideline refers to guideline developed for primary care

**Appendix 3 Questionnaire and results of second round Delphi survey**

| **Agreement on integrated recommendations generated from the first-round Delphi survey (No. of participants)** | **Average score** | **Coefficient of variation** |
| --- | --- | --- |
| **1.** Planning and scoping guidelines | |  |
| **1.1To understand the current situation in primary care institutions by sampling survey or using available data. The variance between different regions, and levels of primary care institutions should be considered.** | 3.81 | 32.08% |
| **Agree**   - Yes, surveys of different regions are necessary, including the organizational context of primary care institutions, disease distribution and the evidence-practice gaps. (2) - Having a multidisciplinary guideline group is supposed to be able to figure this out. A survey is not necessary if the group is representative of all the diversity to be addressed by the guideline. (1)   **Disagree**   - Do not make it too complicated. The idea is to give a general guideline: clinicians are allowed to deviate from the guideline. If you make it too specific, the guideline becomes too complicated. (1) - In our country- primary care is primary care and equal across regions/institutions. (1)   **Not sure**   - As per above, this depends on the scope and purpose of the guidelines.(1) |  |  |
| **1.2 The applicability of existing guidelines should be assessed to decide whether to adapt or to *de novo* develop guidelines for primary care**. | 4.71 | 12.49% |
| **1.2.1 Evaluation levels：Due to the internal variance between primary care institutions, applicability evaluation should cover different regions, levels and categories of primary care institutions and be analyzed both respectively and as a whole.** | 3.65 | 33.50% |
| **Agree**   - It should be possible to make both simultaneously in the same process, results can then be analyzed either regionally, in categories or all together. (1) - The difference of the level of economic development, insurance covering should be considered when assess the applicability of existing guidelines. (2) - A guideline adaptation process that includes assessing the potential rigor, usefulness, appropriateness and implementability, etc of existing or customized guidelines should always be considered before developing guidelines *de novo* as duplication is a waste if it can be avoided. See ADAPTE and CAN IMPLEMENT. (1)   **Disagree**   - Adaption must usually take place at all settings using a guideline so the original guideline should be designed to be adaptable to different contexts. What is an applicability evaluation? Who is doing it? It should be done by the sites implementing not the developers. (1) - This tends to get much too complicated . I would not differentiate too much. (1) - This depends on the scope and purpose of the guideline. (1) |  |  |
| **1.2.2 Evaluation criteria：The evaluation of applicability is not simply “yes” or “no” but should develop a criteria for applicability degree.** | 4.06 | 22.16% |
| **Disagree**   - A site will either adopt or adapt or reject a guideline- what would 50% applicable mean vs 70% applicable. Isn’t it more important to understand how it is not applicable to see if that can be fixed? (1) - I would argue this should be rethought as the ‘likely impact on applicability’ and should always be assessed this way, regardless of the type of guideline or country.(1) |  |  |
| **1.2.3 Evaluation contents：include accessibility, affordability, feasibility (mainly focusing on understanding primary care structure, medical resources, service process, manner of payment, etc.**  **Evaluation methods：via survey, expert opinion**  **Affordability：via survey, expert opinion** | 4.25 | 20.15% |
| **Agree**   - Yes, it is necessary to evaluate the applicability via survey. (1) - How to reach a consensus after survey or expert consultation? Need to be described. (1)   **Disagree**   - Some, like affordability should be based on calculations, not on survey or opinion. (1) - I don’t think survey is the best way to do this. A multidisciplinary discussion is important to pull out ideas that might not have been identified in a survey. There are good tools that can be adapted to do this assessment, and also include analysis of the clarity of the guideline and so on. (2) - A guideline adaptation process that includes assessing the potential rigor, usefulness, appropriateness and implementability, etc of existing or customized guidelines should always be considered before developing guidelines *de novo* as duplication is a waste if it can be avoided. See ADAPTE and CAN IMPLEMENT. (1) |  |  |
| **1.2.4 While evaluating the applicability of current guidelines, we could apply the evidence retrieval and evaluation results in existing guidelines in developing guideline *de novo* to save time and resource.** | 3.88 | 26.44% |
| **Agree**   - Yes, where the existing guidelines are well conducted and reliable, and overlap substantially in scope with the planned guideline. (1) - You need to be sure that the question and search strategy are still appropriate for your question.(1)   **Not sure**   - Depends on evidence and its quality for the current guidelines. If current guidelines are based largely on “expert” opinion, work should be started from scratch, otherwise it will be difficult to get rid of opinions and work using evidence based methodology.(1) |  |  |
| **1.3 Since multi-morbidities are common in patients from primary care settings, the planning for primary care guideline is more complicated including plan for question formulation and evidence retrieval and evaluation.** | 3.53 | 33.40% |
| **Agree**   - Yes, this is not always true, but it is often true. (1) - The medical issues are more complex with multi/co-morbidities that need to be taken into account. (1)   **Disagree**   - Yes. However, the reason is not because of multi-morbidities, but health resources, and affordability of patients in primary care settings. (2) - Based on experience from outside of China, I do not agree. (1) - In fact, patients from all levels of hospitals can suffer from multi-morbidities. The main issue is that the guideline should be applicable for primary care institutions.(3) |  |  |
| **1.4 Time for primary care guideline development：for those adapted from current guidelines—0.5-1 year; for newly developed ones—1-2 years.** | 4.06 | 19.00% |
| **Agree**   - When a group knows how to adapt/develop and there is infrastructure to support them (librarians, methodologists, content experts etc) these are reasonable timelines in most cases. (2) - Agree for time difference, cannot estimate time required. Depends on how experienced involved persons are in working using evidence based methodology.(1) |  |  |
| **2. Setting up guideline groups** |  |  |
| **2.1 Proportion of primary care practitioners in guideline groups should be 20-30%**. | 3.56 | 30.7% |
| **Agree**   - Agree with the proportion. (1)   **Disagree**   - The majority should be primary care providers if the guidelines are for them. (5) - Depends on the content of the guideline, should usually be higher (2) |  |  |
| **2.2 Primary care providers should be included in the guideline steering group and the external review group. Whether they should be included in the guideline development group depends on the professional skills of primary care providers.** | 4.06 | 29.50% |
| **Agree**   - For reasons of acceptance and uptake of the guideline, it is essential to include primary care providers in the development group.(2) - Some representation of primary care providers in guideline development groups useful for buy-in purpose, but members of the guideline groups have to be familiar in working using evidence based methodology. (2) - If they don’t have the skills teach them. Having specialists develop guidelines for generalists is problematic as they don’t understand the generalist context. (1)   **Disagree**   - While the evidence is important- how this translates into care, the preferences of patients and context of delivery are very important. (1) |  |  |
| **2.3 Profession of primary care provider: physicians, administrative staff, nurses or other technical supporters?** | 3.71 | 29.81% |
| **Agree**   - The panel should be interdisciplinary. If the guideline has implications for other professionals they should be included- they bring different perspectives that are useful. (5)   **Disagree**   - Listening to the opinion of all stakeholders is mandatory (consider also asking opinion from patient representatives – called nowadays “experience experts”), but opinion can be sought by other means than membership in the guideline group. Guideline development should be based on evidence, not opinion, so members have to have competence for evaluation of evidence. (1)   **Not sure**   - Depends on how the guideline will be implemented and by whom. (1) |  |  |
| **2.4 Role of** **primary care providers include: scoping the guideline, formulating questions, evaluating applicability of current guidelines, evaluating medical resources of primary care institutions and participating in external review process.** | 4.47 | 16.05% |
| - Primary care providers should participate in the whole process in developing guideline. (2) - The main task of primary care providers is to assess the applicability of the existing guidelines and availability of health resources in primary care. (1) - The question should be generated by the users of the guideline so they must be involved to get it right. (1) - And also assessing relevance of primary research, drafting text and recommendations.(1) - Guideline development should be based on evidence, not opinion, so members have to have competence for evaluation of evidence.(1) |  |  |
| **3. Formulating questions** |  |  |
| **3.1 Number of questions：Depends on the purpose of the guideline and resources available（funding, time, and team size, etc.). Generally ≤ 10 questions would be formulated, while adjustment may be made.** | 4.06 | 16.23% |
| **Disagree**   - Yes it depends- even 10 may be too many depending on what kind of questions they are. (3) - Priotitise quality, not quantity (1) |  |  |
| **3.2 How to formulate questions**: PICOS is more complicated for primary care guideline.  **P (Patient)**: multi-morbidities; **O and I (Outcome and Intervention)**: not only to treat but to prevent diseases | 3.87 | 29.11% |
| **Agree**   - Agree. Guideline for primary should include prevention, rehabilitation, health care of disease. (1)   **Disagree**   - Picos are picos. If you are looking for existing guidelines then it is PIPHOS (see ADAPTE) (1) - Clear question required about disease state of interest or intervention of interest- secondary questions relate to how co-morbidities might influence decision making. (1) |  |  |
| **3.3 Contents of question：Mainly focusing on questions that are valued by primary care providers, and are matched with the mission and service capacity of primary care institutions.** | 4.53 | 13.78% |
| **Agree**   - Guidelines should focus on the user they are intended to.(2) - Might also focus on where there are known mismatches between evidence and practice, or known areas of variation in practice. (1)   **Disagree**   - The content should highlight priorities rather than cover all aspects. |  |  |
| **4. C**hoosing outcomes |  |  |
| **4.1 Outcomes should be in accordance with the primary care realities, and consider relative indicators of disease prevention & control in order to conform to the orientation of primary care.** | 4.41 | 16.15% |
| **Agree**   - Patients and providers should be informing the outcomes that are of most importance to them. (2) - The outcomes should include both health outcome and health system outcome. (1) - The outcome should be of importance to patients from primary care and the health system outcome should be in accordance with the orientation of primary care. (1) |  |  |
| **4.2 Rating outcome should based on multidisciplinary discussion. Whether give priority to primary care providers’ opinion depends on specific guideline.** | 4.19 | 21.75% |
| - Government or other [administrative](file:///C:/Users/Administrator/AppData/Local/youdao/dict/Application/8.0.1.0/resultui/html/index.html#/javascript:;) [department](file:///C:/Users/Administrator/AppData/Local/youdao/dict/Application/8.0.1.0/resultui/html/index.html#/javascript:;)s should be included. (1) - Rating outcome is determined primarily by patients (2) - Outcome should be consensus based – not driven by any one clinical group. (1) |  |  |
| **5.** Evidence retrieval |  |  |
| **5.1 Comprehensive evidence retrieval might not be required. Additional evidence retrieval on the basis of existing guidelines could be considered in order to save time and resources.** | 4.19 | 25.00% |
| **Agree**   - If current guidelines are based largely on “expert” opinion, work should be started from scratch, otherwise it will be difficult to get rid of opinions and work using evidence based methodology. (1) - Where the existing guideline can be shown to be relevant, reliable and well documented. (1) - Supplemental retrieval can be done based on existing guidelines. (1)   **Disagree**   - It mixes guideline adaptation and *de novo* guideline development- these are different processes. If *de novo* development is the focus a comprehensive search is mandatory, if you adapting then it depends on the source documents whether to do more searching (to update or because there is a concern they missed literature). (1)   **Comment**   - The most important aspect is tailoring the evidence to the context of care. (1) |  |  |
| **6.** Evidence assessment |  |  |
| **6.1 There is no need to give priority to evidence (result of research) retrieved from primary care institutions. Whether the target of evidence is consistent with the target patients of primary care guidelines and whether the quality of the evidence is high enough is more important** | 4.06 | 16.74% |
| **Disagree**   - Prevalence in primary care might differ from prevalence in tertiary care. This can have a huge effect. (1) - Whether the evidence produced in a tertiary setting be used in a guideline for primary care depends on whether the evidence is relevant to the primary care question, in some cases maybe. (1)   **Not sure**   - Need to be very careful assessing the quality of this kind of evidence. (1)   **Comment**   - The settings where the evidence was produced could be presented in guideline (eg. in primary care institutions, tertiary hospital). (1) |  |  |
| **6.2 The applicability of evidence should be assessed by questionnaire, expert consulting (primary care providers included).** | 4.18 | 25.73% |
| **Comment**   - What would be the criteria for deciding if it was appropriate? Would add a lot of time to the process potentially for what gain. (1) |  |  |
| **7. Developing recommendations** |  |  |
| **7.1 The availability and resource consumption should be assessed by Delphi survey (primary care providers included) and qualitative survey.** | 4.38 | 23.42% |
| **Agree**   - Cost-effectiveness analysis should be conducted and costs should be considered by panel. (1)   **Not sure**   - Not sure that Delphi method is the best approach for this. (2)   **Comment**   - The applicability for different regions and levels of primary care institutions should be considered in judgment of equity. (1) |  |  |
| **7.2 Preference and values of primary care providers and patients should be evaluated, as well as the orientation of primary care institutions.** | 4.44 | 14.18% |
| **Agree**   - Yes, preference and value of primary care providers and patients should be carefully valued. (1) - Yes. In addition, the value from the aspect of government (eg.health insurance coverage) should be considered. (1) |  |  |
| **8. Producing and publishing guideline** |  |  |
| **8.1 Format: full version and summary version with a link between them.** | 4.71 | 9.98% |
| **Agree**   - Yes if this is what your target audience wants. (2) |  |  |
| **8.2 Recommendations should be the main content in summary version guidelines.** | 4.63 | 10.81% |
| **Agree**   - Yes, agree unless your potential adopters want something else. (2)   **Comment**   - The language of the primary care guideline should be plain and clear so as to be easily understood by primary health care practitioners. (2) - The primary care practitioners , academic organizations, and developers of general guidelines should be included in external review process.(1) |  |  |
| **8.3 The difference between primary care guideline and general guideline could be presented in primary care guideline.** | 4.23 | 19.67% |
| **9.** **Implementation and evaluation** |  |  |
| **9.1 Guideline implementation should be consistent with the access that are available for primary care providers.** | 4.71 | 9.98% |
| - If this is how they want the information or survey them to find out if there are other ways to disseminate the info to them they would prefer. (1) |  |  |
| **9.2 Education and training of guideline is suggested to make primary care practitioners aware of the guideline.** | 4.87 | 7.23% |
| - Yes, education and training of guideline is strongly suggested to make primary care practitioners aware of the guideline. (3) - Yes, but making guidelines available at the time of decision making tailored to a patients profile is a much stronger implementation strategy- eg. computerized decision support. (1) |  |  |
| **10. Updating guidelines** |  |  |
| **10.1 Updating cycle: should be based on guidelines’ subjects, areas, evidence updating speed and change of primary care medical resources, usually every 3-5 years.** | 4.29 | 15.98% |
| **Disagree**   - The updating cycle should not less than 5 years since short time is not conducive to popularization and application. (1)   **Not sure**   - This is very difficult to judge without knowing the topic area. (1) - Needs to be feasible and sustainable updating so panel does need to periodically review the literature. (1) |  |  |
| **10.2 The updating of primary care guidelines could be based on the updating of general guidelines, in order to save time and human resources.** | 3.36 | 21.32% |
| **Agree**   - Where this is feasible.(1) |  |  |

Notes: General guideline refers to guideline developed for all levels of medical institutions. Primary care guideline refers to guideline developed for primary care institutions.
